# Supplementary figures and images for: Generation of a mouse model of thyroid storm and preliminary investigation of the therapeutic effects of ghrelin
Source: PubMed Central journal article supplement — BMC Endocr Disord. 2024 Aug 12;24:150. doi: 10.1186/s12902-024-01680-8 (PMC11318345; doi:10.1186/s12902-024-01680-8), 2024-08-12

**A: Heart**

T3

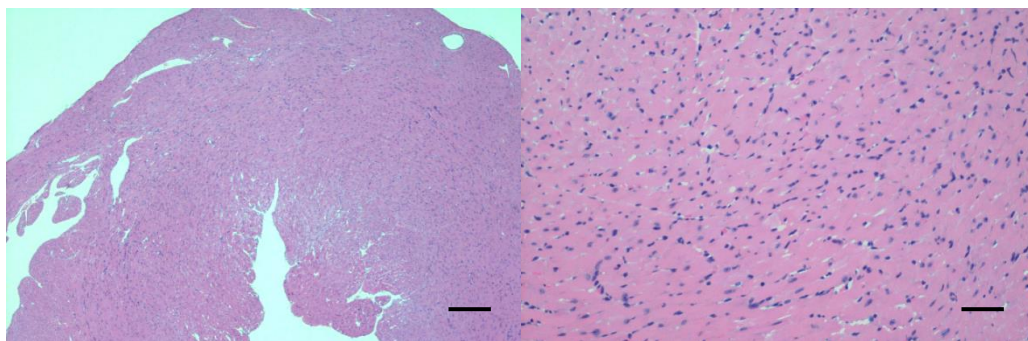

TS

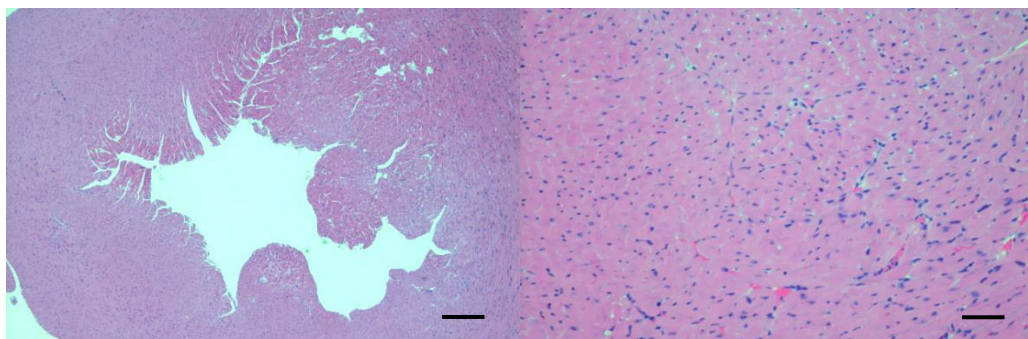

**B: Liver**

T3

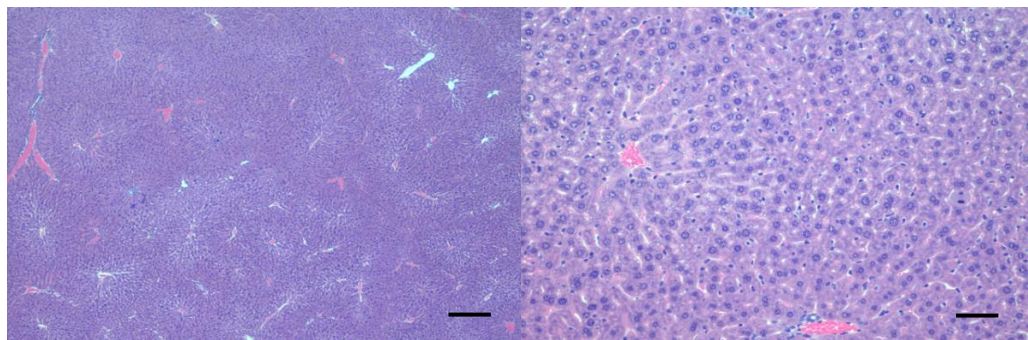

TS

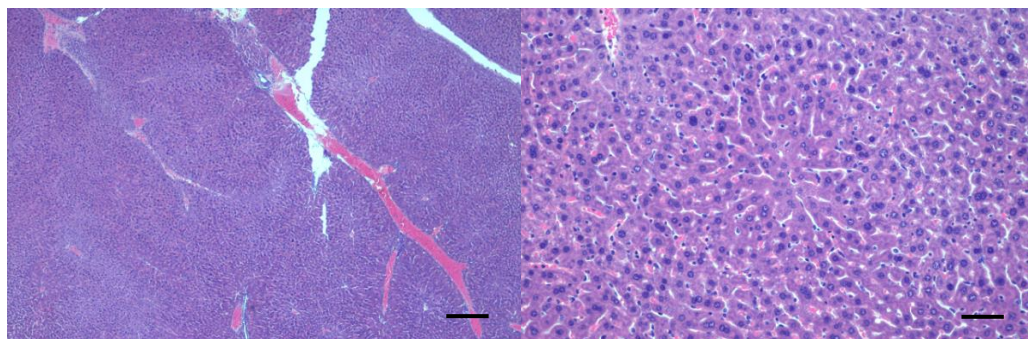

Supplement: 12902_2024_1680_MOESM1_ESM.pdf [file 12902_2024_1680_MOESM1_ESM.pdf]
